# Supplementary material
Source: publisher site journal article supplement (https://www.dovepress.com/article/604568)
Supplement: Supplementary file 1 [file 604568%20Supplementary%20Material.docx]

***Supplementary Figure 1. Box plots of loneliness scores across three measurement tools. Each scale is shown in a separate panel because score ranges differ across instruments.***


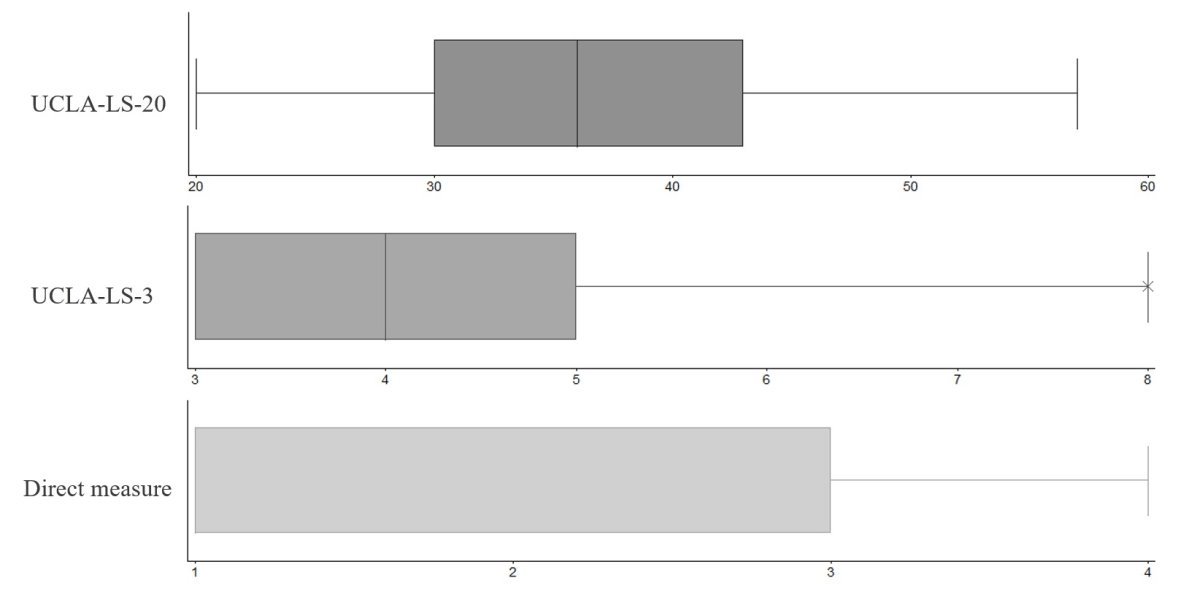


***Supplementary Table 1. Block-wise analyses of factors associated with loneliness across three loneliness measures***

|  | Model 1 | | | Model 2 | | |
| --- | --- | --- | --- | --- | --- | --- |
|  | UCLALS-20 ≥ 43 | UCLA-LS-3 ≥ 6 | Direct measure | UCLALS-20 ≥ 43 | UCLA-LS-3 ≥ 6 | Direct measure |
| *Variable* | *OR (95% CI)* | *OR (95% CI)* | *OR (95% CI)* | *OR (95% CI)* | *OR (95% CI)* | *OR (95% CI)* |
| **Gender** |  |  |  |  |  |  |
| Male | *Ref* | *Ref* | *Ref* | *Ref* | *Ref* | *Ref* |
| Female | 0.84(0.36,1.93) | 1.70(0.61,4.77) | 2.15(0.85,5.46) | 0.72(0.27,1.89) | 2.21(0.63,7.73) | 2.61(0.80,8.52) |
| **Age** |  |  |  |  |  |  |
| <70 | *Ref* | *Ref* | *Ref* | *Ref* | *Ref* | *Ref* |
| ≥70 | 1.90(0.78,4.63) | 2.71(0.90,8.17) | 1.78(0.69,4.59) | 2.31(0.83,6.44) | 1.42(0.39,5.23) | 0.92(0.29,2.91) |
| **Religious beliefs** |  |  |  |  |  |  |
| Yes | *Ref* | *Ref* | *Ref* | *Ref* | *Ref* | *Ref* |
| No | 2.27(0.70,7.33) | 0.83(0.18,3.87) | 1.81(0.552,6.25) | 3.75(1.01,13.92) | 1.93(0.31,12.18) | 3.74(0.85,16.52) |
| **Education level** |  |  |  |  |  |  |
| Elementary school or below | *Ref* | *Ref* | *Ref* | *Ref* | *Ref* | *Ref* |
| Junior high school | 1.30(0.46,3.66) | 2.56(0.75,8.72) | 2.02(0.67,6.10) | 1.05(0.31,3.56) | 1.26(0.26,6.22) | 1.11(0.25,5.00) |
| Senior high school | 0.69(0.24,1.97) | 1.53(0.43,5.42) | 0.99(0.32,3.13) | 0.54(0.16,1.77) | 2.00(0.46,8.82) | 0.99(0.27,3.73) |
| University or above | 0.83(0.24,2.88) | 3.50(0.80,15.33) | 2.98(0.81,10.95) | 0.66(0.15,2.93) | 2.43(0.34,17.36) | 2.01(0.35,11.51) |
| **Marital status** |  |  |  |  |  |  |
| Married | *Ref* | *Ref* | *Ref* | *Ref* | *Ref* | *Ref* |
| Separation, divorce, or widowhood | 1.05(0.29,3.71) | 0.20(0.04,1.01) | 0.47(0.12,1.82) | 0.77(0.16,3.76) | 0.09(0.01,0.67) | 0.32(0.06,1.83) |
| **Living condition** |  |  |  |  |  |  |
| Living alone | *Ref* | *Ref* | *Ref* | *Ref* | *Ref* | *Ref* |
| Living with a spouse or intimate partner | 2.42(0.43,13.60) | 0.41(0.05,3.43) | 0.45(0.08,2.51) | 3.71(0.42,32.62) | 0.44(0.03,6.66) | 0.26(0.03,2.40) |
| Living with a spouse and descendants | 0.97(0.18,5.22) | 0.13(0.02,1.09) | 0.13(0.02,0.71) | 1.25(0.15,10.32) | 0.11(0.01,1.60) | 0.06(0.01,0.59) |
| Living with other relatives or friends | 2.18(0.54,8.75) | 1.02(0.20,5.28) | 0.46(0.12,1.78) | 1.92(0.35,10.68) | 0.98(0.11,8.67) | 0.18(0.03,1.04) |
| **Social media use: text messages** |  |  |  |  |  |  |
| Texting/receiving messages daily or weekly | *Ref* | *Ref* | *Ref* | *Ref* | *Ref* | *Ref* |
| Texting/receiving messages occasionally or never | 0.59(0.24,1.48) | 0.76(0.27,2.14) | 1.38(0.56,3.41) | 0.64(0.23,1.78) | 1.14(0.30,4.28) | 2.43(0.74,7.98) |
| **Social media use: video calls** |  |  |  |  |  |  |
| Making video calls daily or weekly | *Ref* | *Ref* | *Ref* | *Ref* | *Ref* | *Ref* |
| Making video calls occasionally or never | 1.65(0.70,3.85) | 8.34(2.34,29.76) | 4.20(1.59,11.13) | 1.13(0.42,3.06) | 5.05(1.10,23.21) | 2.34(0.70,7.82) |
| **Financial status** |  |  |  |  |  |  |
| Well off | *Ref* | *Ref* | *Ref* | *Ref* | *Ref* | *Ref* |
| Hard up | 3.04(1.41,6.55) | 2.93(1.19,7.23) | 2.74(1.23,6.11) | 1.88(0.75,4.72) | 1.44(0.42,4.95) | 1.35(0.48,3.82) |
| **Employment status** |  |  |  |  |  |  |
| Currently employed | *Ref* | *Ref* | *Ref* | *Ref* | *Ref* | *Ref* |
| Unemployed | 0.91(0.42,1.99) | 2.06(0.76,5.56) | 1.86(0.80,4.32) | 0.67(0.27,1.68) | 1.42(0.42,4.81) | 1.63(0.57,4.63) |
| **LSNS-6** |  |  |  | 0.90(0.83,0.97) | 1.04(0.94,1.15) | 1.00(0.91,1.09) |
| **GDS-15** |  |  |  | 1.33(1.09,1.62) | 1.55(1.21,1.99) | 1.46(1.16,1.85) |
| **GAD-7** |  |  |  | 1.15(1.00,1.32) | 1.00(0.85,1.19) | 1.27(1.07,1.51) |
| **EQ-5D-5L** |  |  |  | 0.74(0.59,0.92) | 1.05(0.79,1.40) | 0.86(0.65,1.14) |
| **EQ-VAS** |  |  |  | 0.99(0.95,1.03) | 0.95(0.91,1.00) | 0.94(0.90,0.99) |
